# Supplementary material for: New Views on Strand Asymmetry in Insect Mitochondrial Genomes
Source: PubMed Central journal article supplement (PMC2939890; doi:10.1371/journal.pone.0012708), 2010-09-15

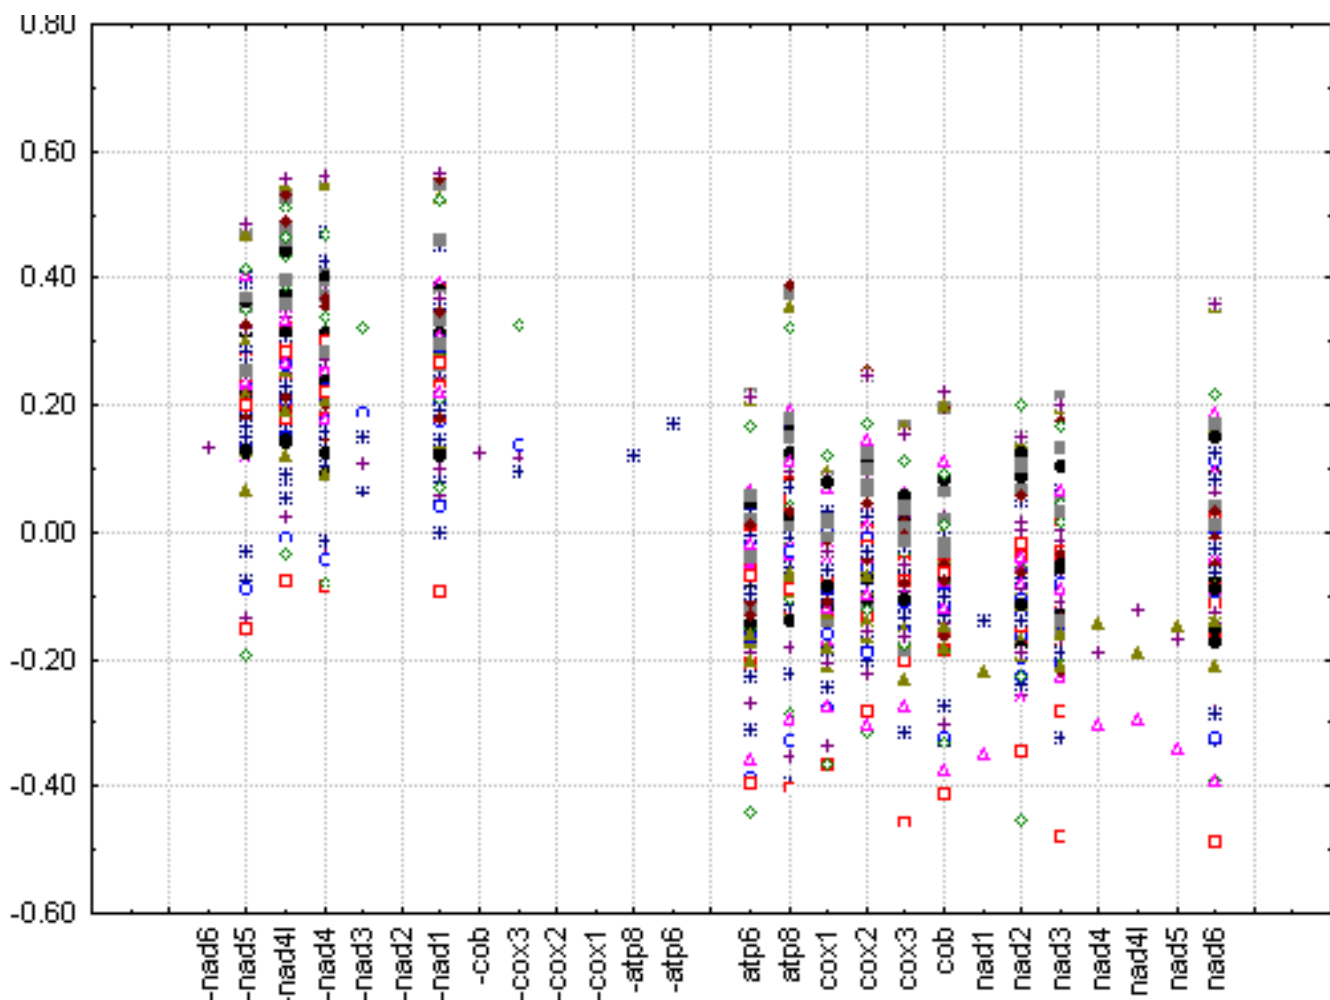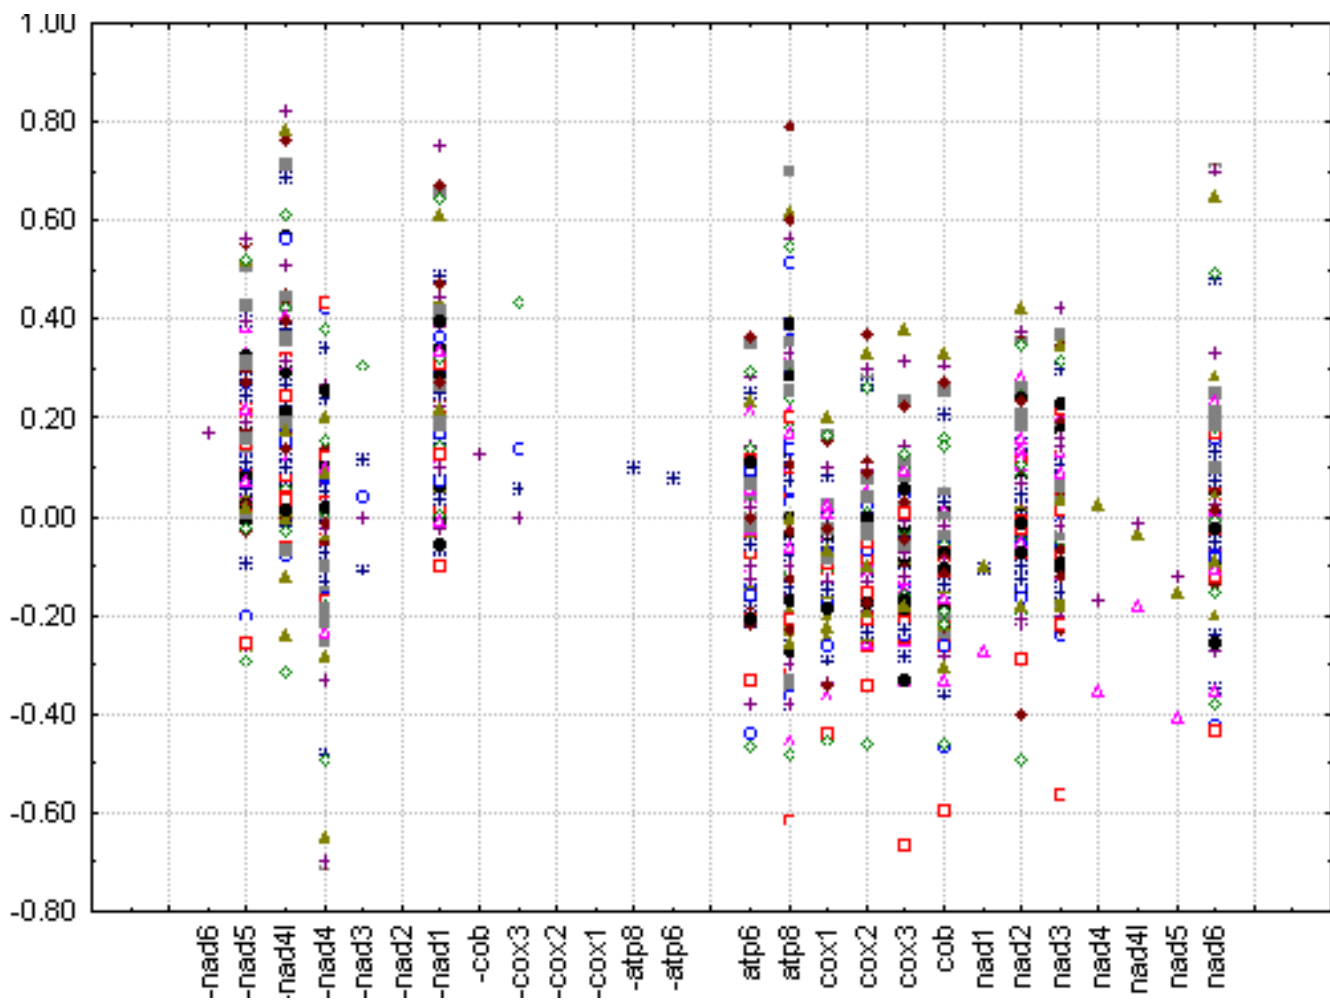

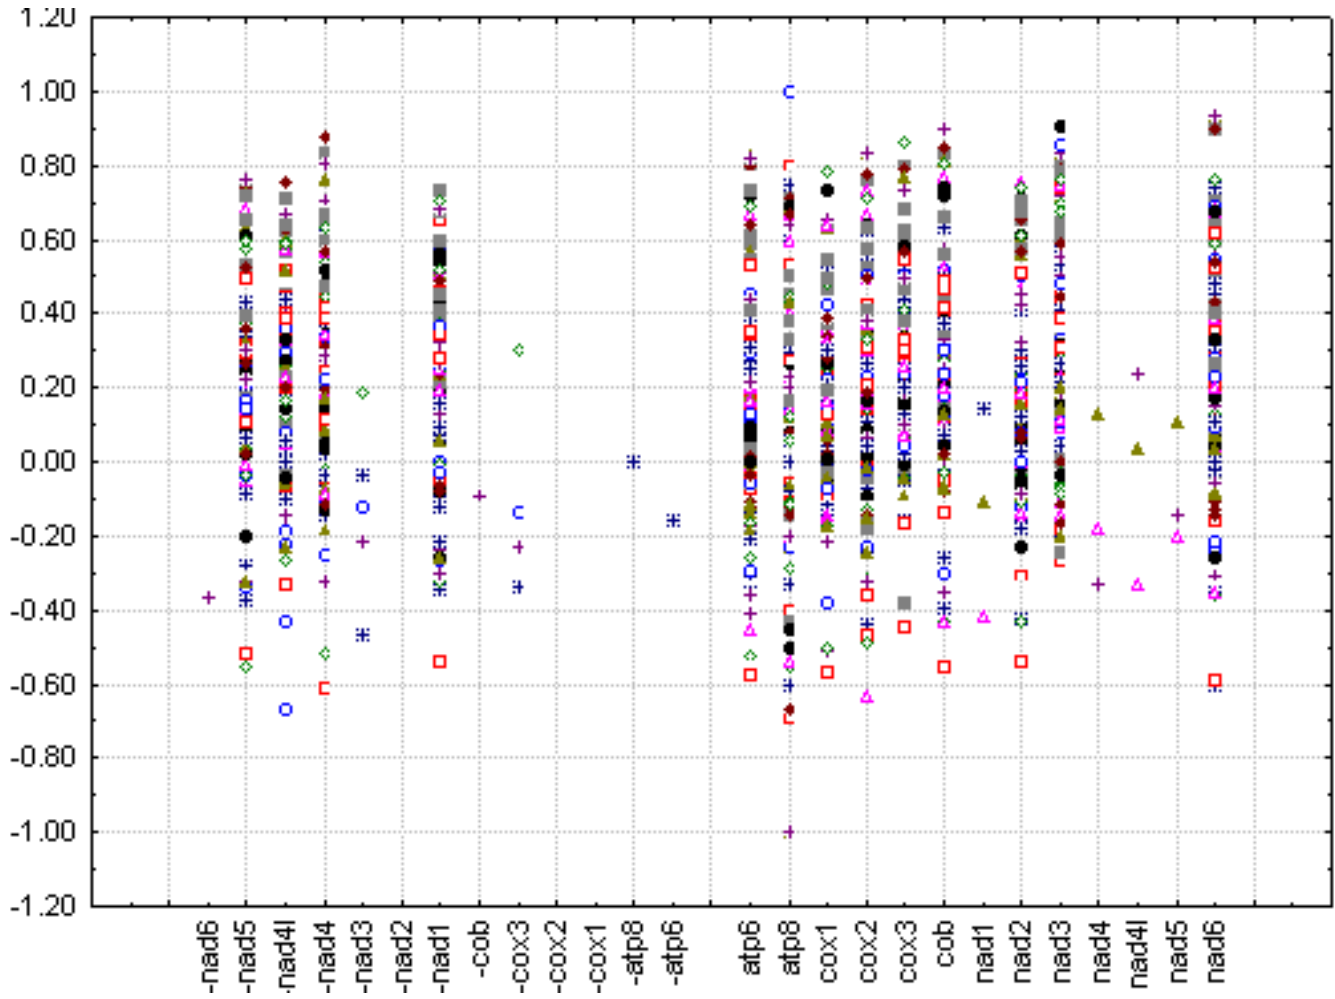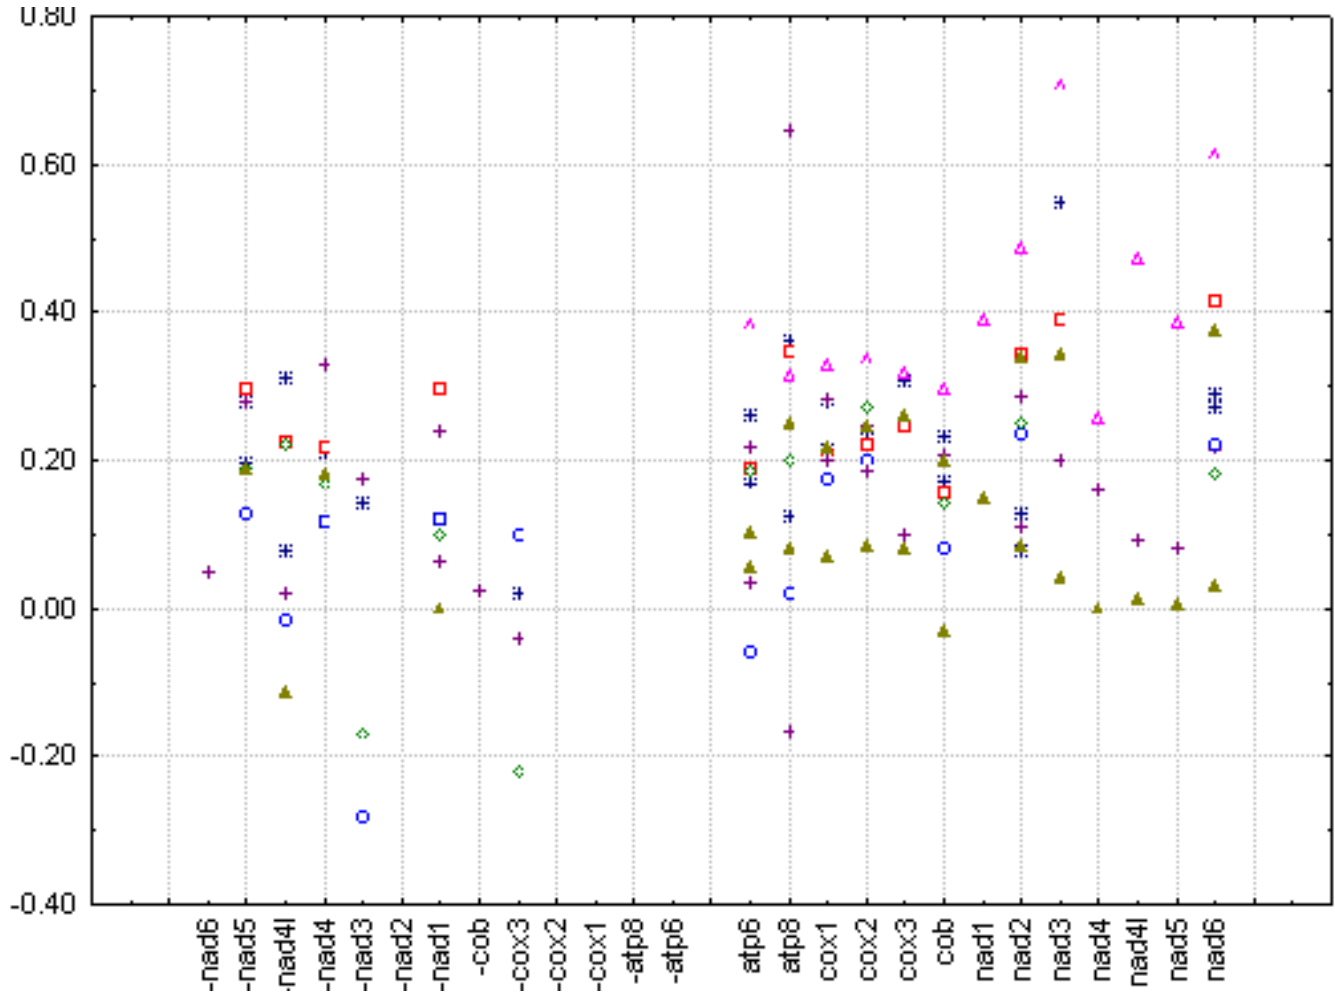





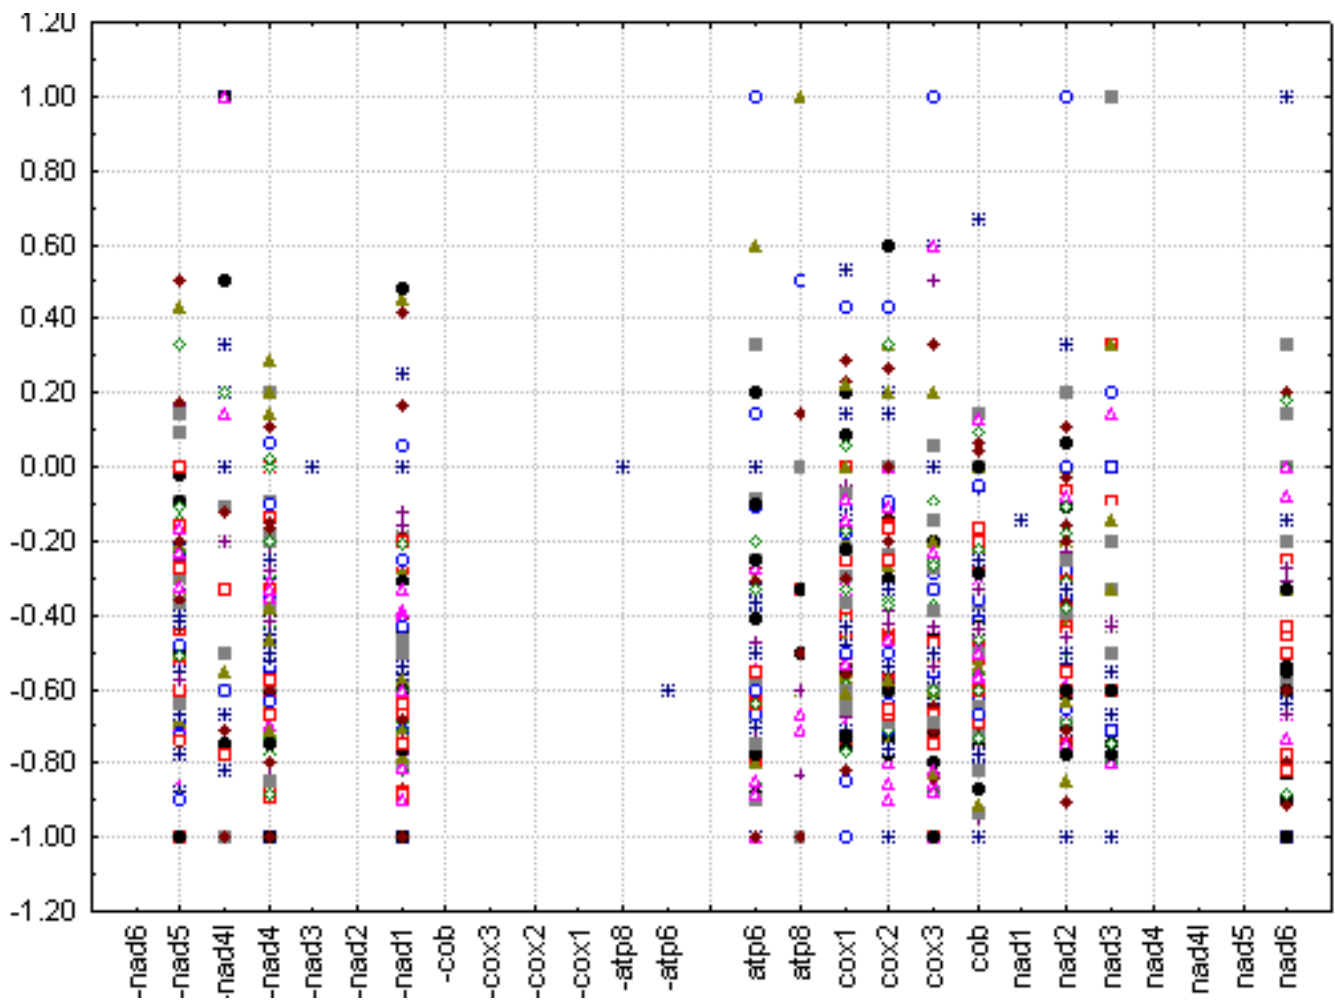

Supplement: pone.0012708.s002.pdf [file pone.0012708.s002.pdf]
